# Supplementary material for: Dielectrophoretic characterization and selection of non-spherical flagellate algae in parallel channels with right-angle bipolar electrodes
Source: Royal Society of Chemistry journal article supplement (doi:10.1039/d4lc00165f), 2024-01-01
Supplement: d4lc00165f1.pdf [file d4lc00165f1.pdf]

*Supporting Information for*

## **Dielectrophoretic Characterization and Selection of Non-spherical Flagellate Algae in the Parallel Channels with Right-angle Bipolar Electrodes**

Xiaoming Chen,<sup>\*a, b</sup> Shun Liu,<sup>a, b</sup> Mo Shen,<sup>a, b</sup> Jishun Shi,<sup>a, b</sup> Chungang Wu,<sup>a, b</sup> Zhipeng Song,<sup>a, b</sup>  
Yong Zhao<sup>\*a, b</sup>

<sup>a</sup> School of Control Engineering, Northeastern University at Qinhuangdao, Qinhuangdao 066004, PR China. E-mail: chenxiaoming@neuq.edu.cn

<sup>b</sup> Hebei Key Laboratory of Micro-Nano Precision Optical Sensing and Measurement Technology, Qinhuangdao, 066004, PR China. E-mail: zhaoyong@ise.neu.edu.cn.

## Section 1: Calculation of capture rate and escape rate

The calculation formula of flagellate microalgae<sup>1, 2</sup>:

$$\text{Capture Rate} = \frac{N_{i-\text{capture}}}{N_{i-\text{capture}} + N_{i-\text{flowout}}} \quad (\text{S1})$$

where  $N_{i-\text{capture}}$  represents the capture number of cells  $i$  to the electrodes,  $N_{i-\text{flowout}}$  represents flow-out number of cells  $i$  in channels.

The calculation formula of flagellate microalgae<sup>1</sup>:

$$\text{Escape Rate} = \frac{N_{i-\text{escape}}}{N_{i-\text{captured}}} \quad (\text{S2})$$

where  $N_{i-\text{escape}}$  represents the escape number of cells  $i$  from electrodes,  $N_{i-\text{captured}}$  represents the captured number of cells  $i$  at electrodes.

## Section 2: Escape behaviors of flagellate algae

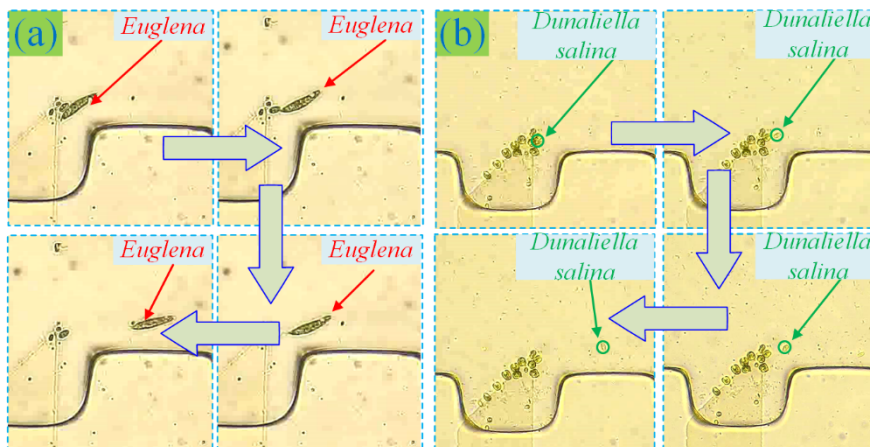

Fig. S1 Escape behaviors of flagellate algae. Escape of (a) *Euglena*, (b) *Dunaliella salina*.

### Section 3: Migration of captured flagellate microalgae between electrodes

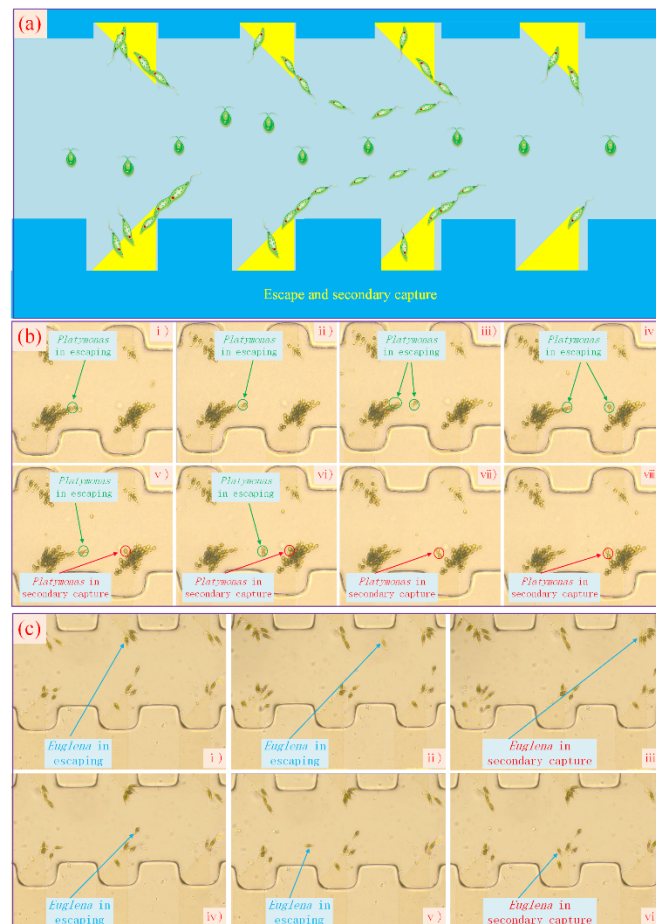

Fig. S2 Migration of captured flagellate microalgae between front and backward bipolar electrodes. (a) The sketch map demonstrating the escape and secondary capture of trapped flagellate microalgae. (b/c) Migration of captured *Platymonas/Euglena* between front and backward bipolar electrodes.

#### Section 4: The capture of *Euglena* with different aspect ratios (ARs)

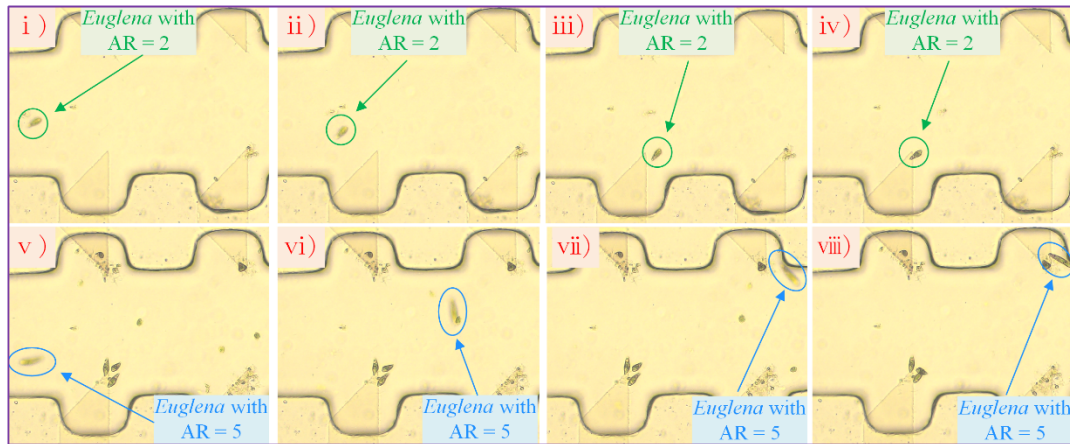

Fig. S3 The capture of *Euglena* with AR=2 and 5.

## Section 5: Comparison with conventional microfluidic separation methods of microalgae

Table S1 Comparison with conventional microfluidic separation methods of microalgae

| Author                       | Samples                                                                         | Methods                                              | Recovery Purity                                                |
|------------------------------|---------------------------------------------------------------------------------|------------------------------------------------------|----------------------------------------------------------------|
| Y Wang, et al <sup>3</sup>   | <i>Platymonas</i> , <i>Closterium</i> , and polystyrene particles               | Dielectrophoresis aroused by 3-dimensional electrode | About 90% for <i>Platymonas</i> , <i>Closterium</i>            |
| Y Wang, et al <sup>4</sup>   | <i>Platymonas</i> and impurities                                                | Deterministic lateral displacement                   | 89.4% for <i>Platymonas</i>                                    |
| D Jiang, et al <sup>5</sup>  | <i>H. pluvialis</i> and ciliate                                                 | dean-coupled inertial microfluidics                  | 87.1% for <i>H. pluvialis</i>                                  |
| H Hadady, et al <sup>6</sup> | <i>C. reinhardtii</i> of different lipid content                                | Oblique interdigitated electrode array               | 74% for the high-lipid <i>C. reinhardtii</i>                   |
| The manuscript               | <i>Platymonas</i> and <i>D. salina</i> , <i>H. pluvialis</i> and <i>Euglena</i> | Right-angle bipolar electrode array                  | 92.78% for <i>D. salina</i> and 92.06% for <i>H. pluvialis</i> |

## Section 6: Statistical Significance Testing

(a) Separation of *Chlamydomonas reinhardtii* and *Haematococcus pluvialis*

Table S2 Confidence intervals of capture rate(CR) under different frequencies  
(SD:standard deviation, CI: confidence interval at the confidence level of 95%)

| Frequency (MHz) | <i>Chlamydomonas reinhardtii</i> |       |                      |                       | <i>Haematococcus pluvialis</i> |       |                      |                       |
|-----------------|----------------------------------|-------|----------------------|-----------------------|--------------------------------|-------|----------------------|-----------------------|
|                 | Mean of CR (%)                   | SD(%) | Lower limit of CI(%) | Upper limit of CI (%) | Mean of CR (%)                 | SD(%) | Lower limit of CI(%) | Upper limit of CI (%) |
| 0.5             | 35.00                            | 0.307 | 34.71                | 35.30                 | 20.20                          | 1.318 | 18.94                | 21.46                 |
| 1.0             | 33.00                            | 1.439 | 31.63                | 34.38                 | 17.41                          | 0.585 | 16.85                | 17.97                 |
| 2.0             | 10.16                            | 0.619 | 9.57                 | 10.75                 | 0                              | 0     | 0                    | 0                     |
| 5.0             | 0                                | 0     | 0                    | 0                     | 0                              | 0     | 0                    | 0                     |

Table S3 Confidence intervals of CR with different flow rates

| Flow rate( $\mu$ L/h) | <i>Chlamydomonas reinhardtii</i> |       |                      |                       | <i>Haematococcus pluvialis</i> |       |                      |                       |
|-----------------------|----------------------------------|-------|----------------------|-----------------------|--------------------------------|-------|----------------------|-----------------------|
|                       | Mean of CR (%)                   | SD(%) | Lower limit of CI(%) | Upper limit of CI (%) | Mean of CR (%)                 | SD(%) | Lower limit of CI(%) | Upper limit of CI (%) |
| 21.6                  | 17.79                            | 0.463 | 17.35                | 18.23                 | 21.50                          | 1.08  | 20.47                | 22.53                 |
| 36.0                  | 15.59                            | 0.870 | 14.76                | 16.42                 | 0                              | 0     | 0                    | 0                     |
| 54.0                  | 14.35                            | 0.460 | 13.91                | 14.79                 | 0                              | 0     | 0                    | 0                     |

Table S4 Confidence intervals of CR under different voltage amplitudes

| Voltage( $V_{pp}$ ) | <i>Chlamydomonas reinhardtii</i> |       |                      |                       | <i>Haematococcus pluvialis</i> |       |                      |                       |
|---------------------|----------------------------------|-------|----------------------|-----------------------|--------------------------------|-------|----------------------|-----------------------|
|                     | Mean of CR (%)                   | SD(%) | Lower limit of CI(%) | Upper limit of CI (%) | Mean of CR (%)                 | SD(%) | Lower limit of CI(%) | Upper limit of CI (%) |
| 10.00               | 14.21                            | 0.475 | 13.76                | 14.67                 | 0                              | 0     | 0                    | 0                     |
| 11.25               | 17.62                            | 0.659 | 16.99                | 18.25                 | 0                              | 0     | 0                    | 0                     |
| 12.50               | 24.40                            | 0.593 | 23.83                | 24.96                 | 7.28                           | 0.625 | 6.68                 | 7.87                  |
| 13.75               | 25.48                            | 0.508 | 24.99                | 25.97                 | 14.40                          | 0.900 | 13.54                | 15.26                 |
| 15.00               | 28.80                            | 1.024 | 27.82                | 29.77                 | 17.42                          | 0.540 | 16.90                | 17.93                 |

(b) separation of *Euglena* and *Haematococcus pluvialis*

Table S5 Confidence intervals of CR under different voltage amplitudes

| Voltage(<br>V <sub>pp</sub> ) | <i>Euglena</i>       |       |                            |                             | <i>Haematococcus pluvialis</i> |       |                            |                             |
|-------------------------------|----------------------|-------|----------------------------|-----------------------------|--------------------------------|-------|----------------------------|-----------------------------|
|                               | Mean<br>of CR<br>(%) | SD(%) | Lower<br>limit of<br>CI(%) | Upper<br>limit of<br>CI (%) | Mean<br>of CR<br>(%)           | SD(%) | Lower<br>limit of<br>CI(%) | Upper<br>limit of CI<br>(%) |
| 13.75                         | 60.45                | 1.412 | 59.11                      | 61.80                       | 3.94                           | 0.24  | 3.71                       | 4.17                        |
| 15.00                         | 66.21                | 1.636 | 64.65                      | 67.77                       | 5.76                           | 0.499 | 5.28                       | 6.23                        |
| 16.25                         | 83.51                | 1.271 | 82.30                      | 84.73                       | 9.78                           | 0.536 | 9.28                       | 10.30                       |
| 17.50                         | 85.34                | 0.657 | 84.71                      | 85.96                       | 11.79                          | 0.342 | 11.46                      | 12.12                       |
| 18.00                         | 89.59                | 0.663 | 88.96                      | 90.22                       | 13.45                          | 0.776 | 12.71                      | 14.19                       |

Table S6 Confidence intervals of escape rate(ER) under different voltage amplitudes

| Voltage(<br>V <sub>pp</sub> ) | <i>Euglena</i>       |       |                            |                             | <i>Haematococcus pluvialis</i> |       |                            |                             |
|-------------------------------|----------------------|-------|----------------------------|-----------------------------|--------------------------------|-------|----------------------------|-----------------------------|
|                               | Mean<br>of ER<br>(%) | SD(%) | Lower<br>limit of<br>CI(%) | Upper<br>limit of<br>CI (%) | Mean<br>of CR<br>(%)           | SD(%) | Lower<br>limit of<br>CI(%) | Upper<br>limit of CI<br>(%) |
| 13.75                         | 42.80                | 1.934 | 40.95                      | 44.64                       | 100                            | 0     | 100                        | 100                         |
| 15.00                         | 38.44                | 2.032 | 36.50                      | 40.38                       | 100                            | 0     | 100                        | 100                         |
| 16.25                         | 24.83                | 1.808 | 23.10                      | 26.55                       | 33.12                          | 3.337 | 29.94                      | 36.30                       |
| 17.50                         | 8.61                 | 0.520 | 8.11                       | 9.10                        | 0                              | 0     | 0                          | 0                           |
| 18.00                         | 0                    | 0     | 0                          | 0                           | 0                              | 0     | 0                          | 0                           |

Table S7 Confidence intervals of separation purity under different voltage amplitudes

| Voltage(V <sub>pp</sub> ) | Mean of Purity<br>(%) | SD(%) | Lower limit of CI(%) | Upper limit of CI (%) |
|---------------------------|-----------------------|-------|----------------------|-----------------------|
| 13.75                     | 68.63                 | 1.103 | 67.58                | 69.68                 |
| 15.00                     | 70.53                 | 1.468 | 69.13                | 71.93                 |
| 16.25                     | 81.99                 | 0.492 | 81.52                | 82.46                 |
| 17.50                     | 85.53                 | 0.888 | 84.69                | 86.38                 |
| 18.00                     | 92.06                 | 1.054 | 91.06                | 93.07                 |



(c) Separation of *Platymonas* and *Dunaliella salina*

Table S8 Confidence intervals of CR under different voltage amplitudes

| Voltage(<br>V <sub>PP</sub> ) | <i>Platymonas</i>    |       |                            |                             | <i>Dunaliella salina</i> |       |                            |                             |
|-------------------------------|----------------------|-------|----------------------------|-----------------------------|--------------------------|-------|----------------------------|-----------------------------|
|                               | Mean<br>of CR<br>(%) | SD(%) | Lower<br>limit of<br>CI(%) | Upper<br>limit of<br>CI (%) | Mean<br>of CR<br>(%)     | SD(%) | Lower<br>limit of<br>CI(%) | Upper<br>limit of CI<br>(%) |
| 15.00                         | 14.57                | 0.949 | 13.66                      | 15.47                       | 5.01                     | 0.359 | 4.66                       | 5.35                        |
| 17.50                         | 32.69                | 1.267 | 31.48                      | 33.90                       | 5.65                     | 0.913 | 4.78                       | 6.52                        |
| 20.00                         | 39.44                | 0.488 | 38.97                      | 39.90                       | 6.55                     | 0.325 | 6.24                       | 6.86                        |
| 22.50                         | 41.84                | 1.665 | 40.26                      | 43.43                       | 9.10                     | 0.373 | 8.75                       | 9.46                        |
| 25.00                         | 44.24                | 0.665 | 43.60                      | 44.87                       | 9.49                     | 0.456 | 9.05                       | 9.92                        |
| 27.50                         | 55.50                | 0.664 | 54.87                      | 56.13                       | 9.93                     | 0.481 | 9.47                       | 10.39                       |
| 32.50                         | 56.96                | 1.280 | 55.74                      | 58.18                       | 10.53                    | 0.648 | 9.91                       | 11.15                       |
| 35.00                         | 72.39                | 1.599 | 70.86                      | 73.91                       | 11.01                    | 0.648 | 10.39                      | 11.63                       |

Table S9 Confidence intervals of separation purity under different voltage amplitudes

| Voltage(V <sub>PP</sub> ) | Mean of Purity<br>(%) | SD(%) | Lower limit of CI(%) | Upper limit of CI (%) |
|---------------------------|-----------------------|-------|----------------------|-----------------------|
| 15.00                     | 73.61                 | 1.690 | 72.00                | 75.22                 |
| 17.50                     | 84.97                 | 1.700 | 83.35                | 86.59                 |
| 20.00                     | 88.48                 | 0.792 | 87.72                | 89.23                 |
| 22.50                     | 88.28                 | 0.656 | 87.66                | 88.91                 |
| 25.0                      | 88.16                 | 1.572 | 86.67                | 89.66                 |
| 27.50                     | 91.13                 | 0.926 | 90.24                | 92.01                 |
| 32.50                     | 91.39                 | 1.008 | 90.42                | 92.35                 |
| 35.00                     | 92.78                 | 1.027 | 91.80                | 93.76                 |

(d) Separation of Live and Dead *Euglena*

Table S10 Confidence intervals of CR under different voltage amplitudes

| Status | Mean of CR(%) | SD(%) | Lower limit of CI(%) | Upper limit of CI (%) |
|--------|---------------|-------|----------------------|-----------------------|
| Live   | 99.06         | 0.880 | 98.22                | 99.90                 |
| Dead   | 0             | 0     | 0                    | 0                     |

Table S11 Confidence intervals of separation purity under different voltage amplitudes

| Status | Mean of Purity (%) | SD(%) | Lower limit of CI(%) | Upper limit of CI (%) |
|--------|--------------------|-------|----------------------|-----------------------|
| Live   | 100                | 0     | 100                  | 100                   |
| Dead   | 97.12              | 2.647 | 94.60                | 99.65                 |

## Section 7: Videos

Video S1 Dielectrophoretic assembly of *Euglena* and *H. pluvialis* at  $A=17.5 V_{pp}$  and  $f=1$  MHz

Video S2 Separation of *H. pluvialis* and *C. reinhardtii* at  $A=12.5 V_{pp}$  and  $f=1$  MHz

Video S3 Separation of *Euglena* and *Platymonas* at  $A=50 V_{pp}$  and  $f=1$  MHz

Video S4 Separation of *Platymonas* and *Dunaliella salina* at  $A=27.5 V_{pp}$  and  $f=1$  MHz

Video S5 Separation of live and dead *Euglena* at  $A=50 V_{pp}$  and  $f=1$  MHz

## Reference

1. C. Lu, J. Xu, J. Han, X. Li, N. Xue, J. Li, W. Wu, X. Sun, Y. Wang, Q. Ouyang, G. Yang and C. Luo, *Lab Chip*, 2020, **20**, 4094-4105.
2. D. Yin, A. Shi, B. Zhou, M. Wang, G. Xu, M. Shen, X. Zhu and X. Shi, *Langmuir*, 2022, **38**, 11080-11086.
3. Y. Wang, J. Wang, X. Wu, Z. Jiang and W. Wang, *Electrophoresis*, 2019, **40**, 969-978.
4. Y. Wang, J. Wang, Y. Wu and J. Dong, *Journal of Chemical Technology & Biotechnology*, 2021, **96**, 2228-2237.
5. D. Jiang, L. Wang, Y. Liu, X. Huo, J. Lin and L. Li, *J Sep Sci*, 2022, **45**, 3900-3908.
6. H. Hadady, D. Redelman, S. R. Hiibel and E. J. Geiger, *AIMS Biophysics*, 2016, **3**, 398-414.
